# Supplementary material for: High Throughput Virtual Screening to Discover Inhibitors of the Main Protease of the Coronavirus SARS-CoV-2
Source: Preprints.org preprint supplement (doi:10.20944/preprints202004.0161.v2), 2020-06-01
Supplement: Supplementary file 1 [file supplementary]

# Supplementary Materials: High throughput virtual screening to discover inhibitors of the main protease of the coronavirus SARS-CoV-2

Olujide O. Olubiyi<sup>1,2\*</sup>, Maryam Olagunju<sup>1</sup>, Monika Keutmann<sup>1</sup>, Jennifer Loschwitz<sup>1,3</sup>, and Birgit Strodel<sup>1,3\*</sup>

**1** Institute of Biological Information Processing: Structural Biochemistry, Forschungszentrum Jülich, Jülich, Germany

**2** Department of Pharmaceutical Chemistry, Faculty of Pharmacy, Obafemi Awolowo University, Ile-Ife, Nigeria

**3** Institute of Theoretical and Computational Chemistry, Heinrich Heine University Düsseldorf, 40225 Düsseldorf, Germany

\* Corresponding authors: olubiyio@oauife.edu.ng, b.strodel@fz-juelich.de

## List of Figures

|    |                                                                                                                                                                                                                     |   |
|----|---------------------------------------------------------------------------------------------------------------------------------------------------------------------------------------------------------------------|---|
| S1 | Chemical fragments majorly featured in the top performing 9,515 synthetic compounds obtained from screening against the crystal structure of the SARS-CoV-2 main protease 3CL <sup>pro</sup> . . . . .              | 2 |
| S2 | Chemical fragments majorly featured in the top 2,102 synthetic compounds obtained from ensemble docking and application of cutoff values of $\Delta G \leq -7.0$ kcal/mol and $d_{\text{dyad}} \leq 3.5$ Å. . . . . | 2 |
| S3 | The poses and 3CL <sup>pro</sup> -compound interactions of phthalocyanine and hypericin. . . . .                                                                                                                    | 3 |
| S4 | The poses and 3CL <sup>pro</sup> -compound interactions of the four best non-FDA-approved and investigational drugs. . . . .                                                                                        | 4 |
| S5 | The poses and 3CL <sup>pro</sup> -compound interactions of zeylanone and glabrolide. . . . .                                                                                                                        | 5 |

## List of Tables

|    |                                                                                                       |   |
|----|-------------------------------------------------------------------------------------------------------|---|
| S1 | Names and properties of the compounds binding best to the active site of 3CL <sup>pro</sup> . . . . . | 6 |
|----|-------------------------------------------------------------------------------------------------------|---|

|                                                                                            |                                                                                          |                                                                                          |                                                                                           |                                                                                           |                                                                                            |                                                                                            |
|--------------------------------------------------------------------------------------------|------------------------------------------------------------------------------------------|------------------------------------------------------------------------------------------|-------------------------------------------------------------------------------------------|-------------------------------------------------------------------------------------------|--------------------------------------------------------------------------------------------|--------------------------------------------------------------------------------------------|
| <br>10122 | <br>829 | <br>816 | <br>812  | <br>676 | <br>528 | <br>511 |
| <br>508   | <br>445 | <br>441 | <br>383  | <br>356 | <br>317 | <br>317 |
| <br>247   | <br>221 | <br>211 | <br>193  | <br>184 | <br>182 | <br>180 |
| <br>150   | <br>150 | <br>141 | <br>139  | <br>127  | <br>123 | <br>115 |
| <br>114   | <br>103 | <br>102 | <br>98   | <br>96  | <br>92  | <br>86  |
| <br>85   | <br>85 | <br>83 | <br>82 | <br>74 | <br>74 | <br>73 |

**Figure S1: Chemical fragments majorly featured in the top performing 9,515 synthetic compounds obtained from screening against the crystal structure of the SARS-CoV-2 main protease 3CL<sup>pro</sup>. The numbers represent the occurrence in absolute numbers.**

|                                                                                             |                                                                                            |                                                                                            |                                                                                            |                                                                                             |                                                                                              |                                                                                              |
|---------------------------------------------------------------------------------------------|--------------------------------------------------------------------------------------------|--------------------------------------------------------------------------------------------|--------------------------------------------------------------------------------------------|---------------------------------------------------------------------------------------------|----------------------------------------------------------------------------------------------|----------------------------------------------------------------------------------------------|
| <br>2264 | <br>206 | <br>194 | <br>187 | <br>151 | <br>118 | <br>114 |
| <br>107  | <br>94  | <br>81  | <br>79  | <br>77  | <br>65  | <br>57  |

**Figure S2: Chemical fragments majorly featured in the top 2,102 synthetic compounds obtained from ensemble docking and application of cutoff values of  $\Delta G \leq -7.0$  kcal/mol and  $d_{\text{dyad}} \leq 3.5$  Å. The numbers represent the occurrence in absolute numbers.**

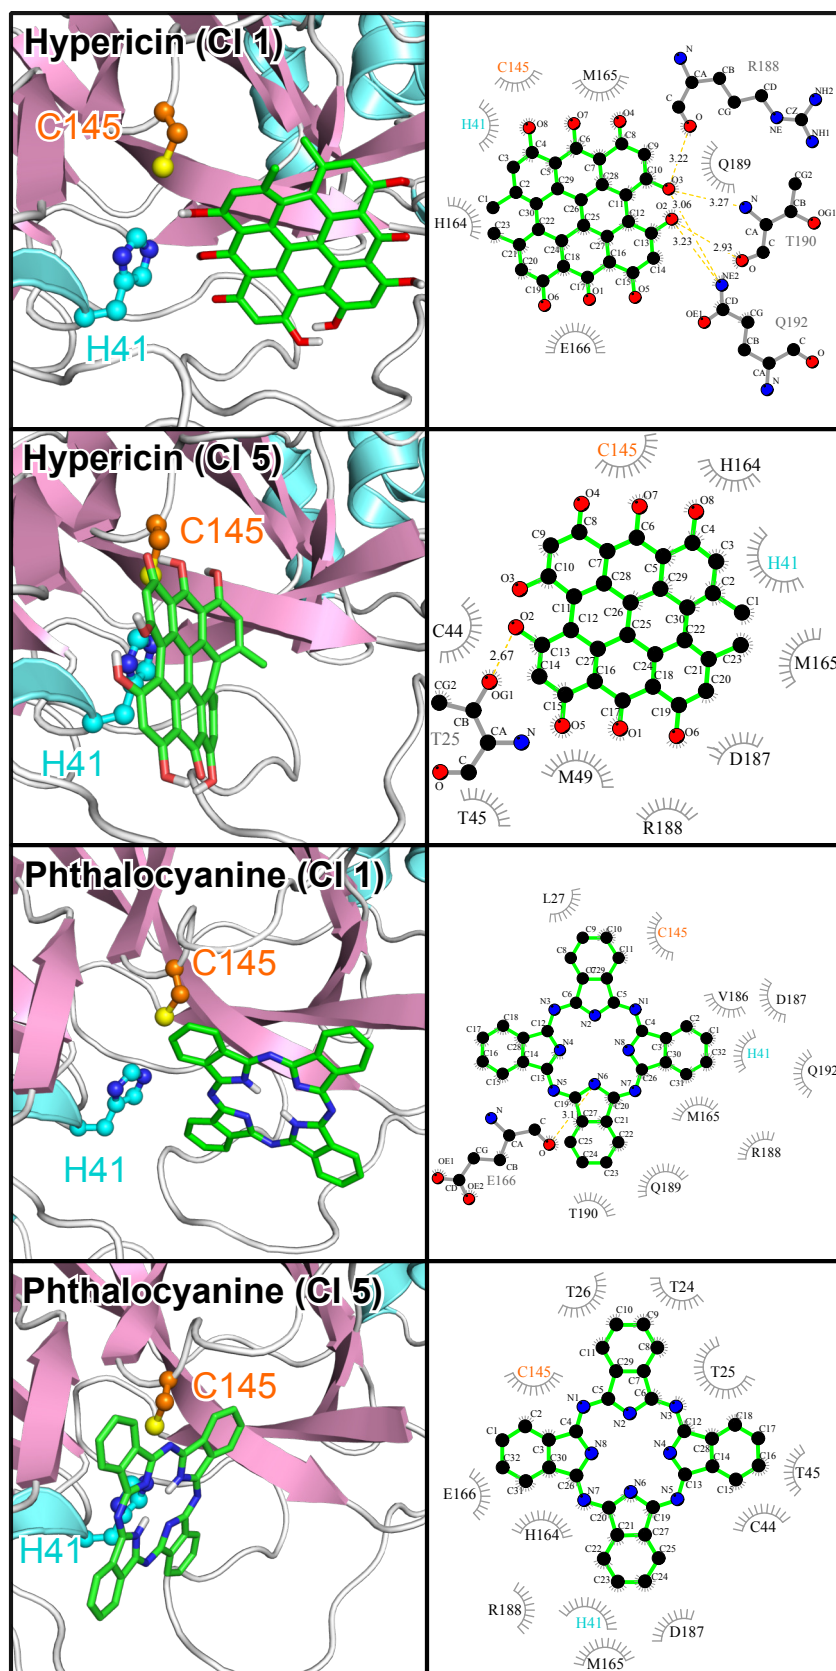

Figure S3: The poses and 3CL<sup>pro</sup>-compound interactions of phthalocyanine and hypericin.

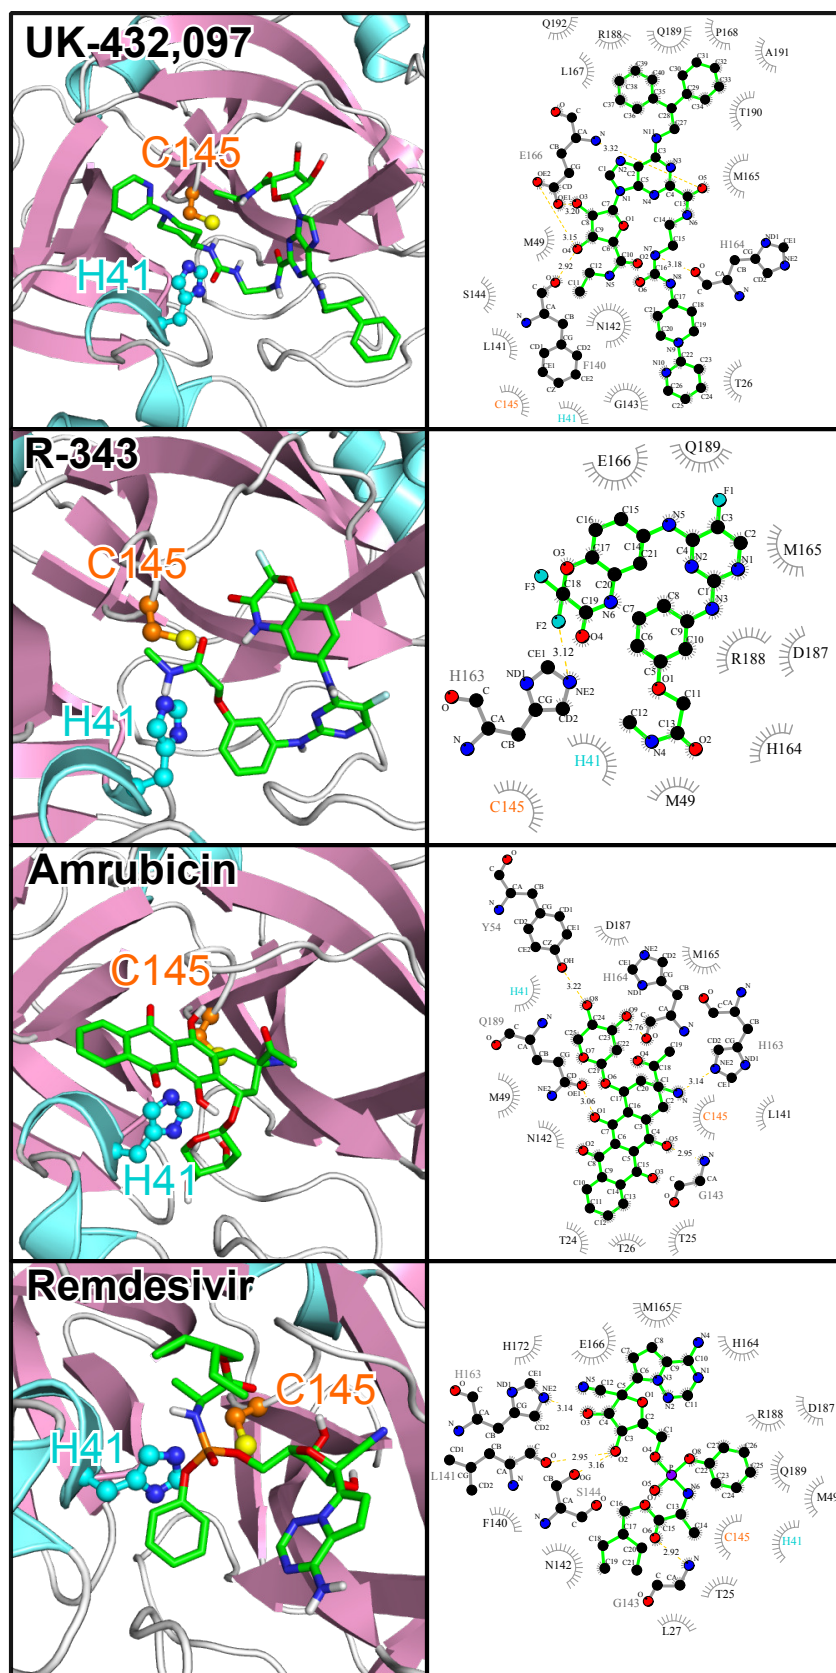

Figure S4: The poses and 3CL<sup>pro</sup>-compound interactions of the four best non-FDA-approved and investigational drugs.

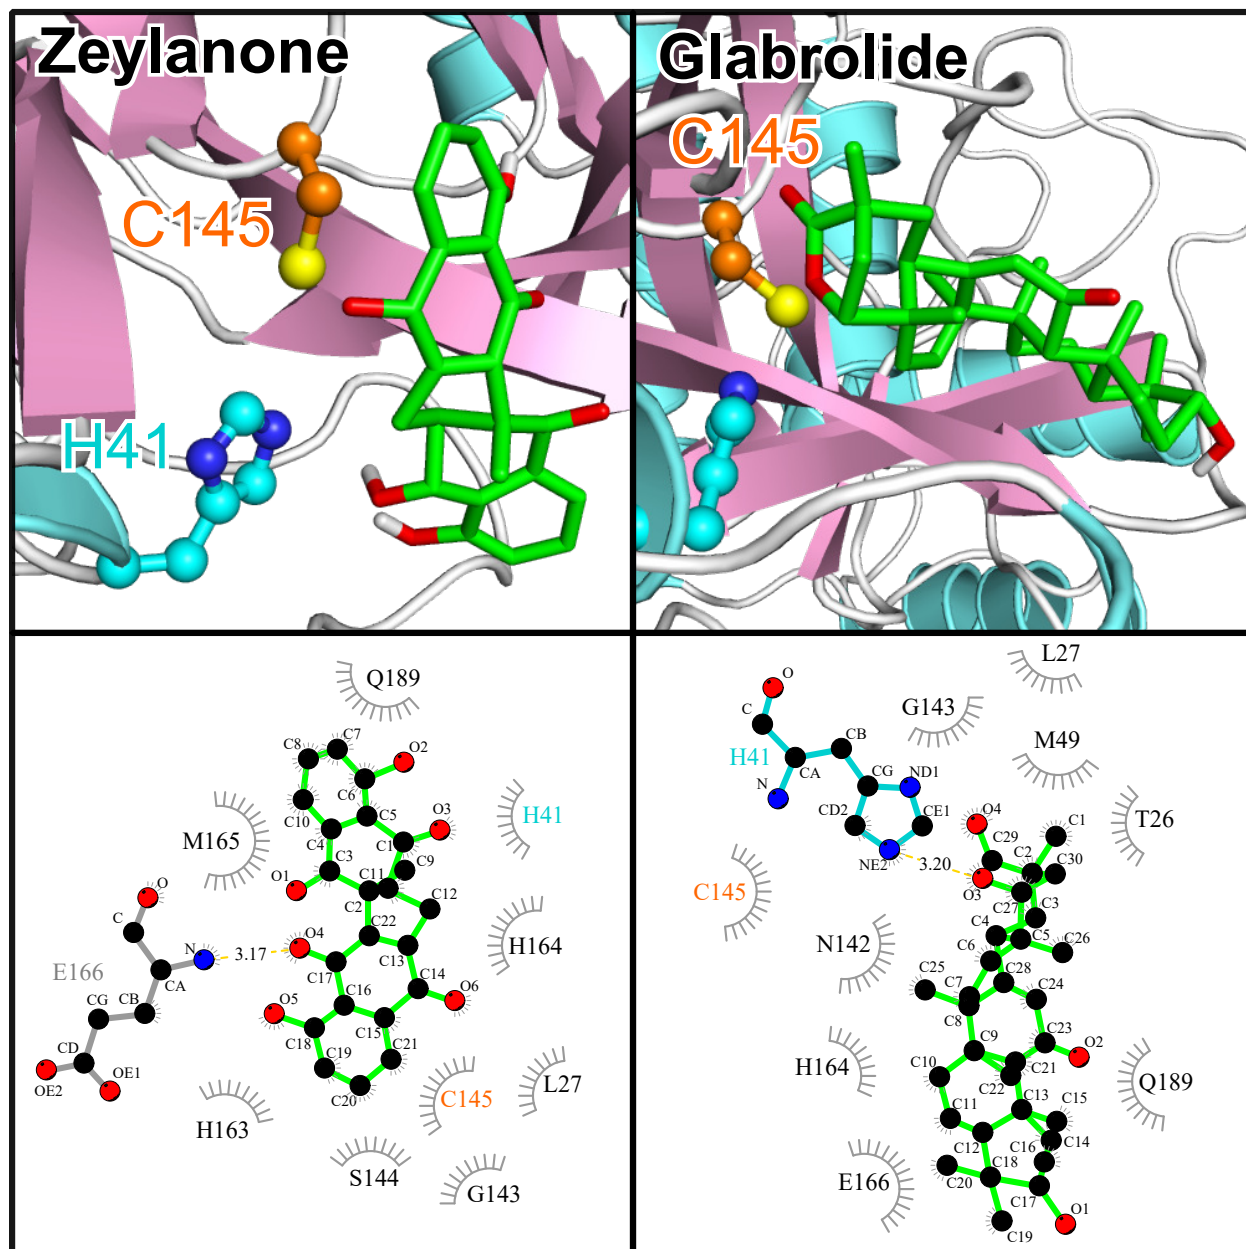

Figure S5: The poses and 3CL<sup>pro</sup>-compound interactions of zeylanone and glabrolide.

**Table S1: Names and properties of the compounds binding best to the active site of 3CL<sup>pro</sup>.** These compounds include FDA-approved drugs, other drugs, natural products, steroids, and eight reference compounds. The  $\Delta G$  values and distances to the catalytic dyad ( $d_{\text{dyad}}$ ) are average values obtained from ensemble docking against five representative structures of 3CL<sup>pro</sup> obtained from MD simulation. The compounds highlighted in bold are discussed in more detail in the text.

| No.              | Accession ID            | Compound name      | $\Delta G$ [kcal/mol] | $d_{\text{dyad}}$ [Å] |
|------------------|-------------------------|--------------------|-----------------------|-----------------------|
| <b>FDA drugs</b> |                         |                    |                       |                       |
| <b>1</b>         | <b>ZINC000006716957</b> | <b>Nilotinib</b>   | <b>-8.66</b>          | <b>3.43</b>           |
| 2                | ZINC000064033452        | Lumacaftor         | -8.36                 | 3.36                  |
| 3                | ZINC000018324776        | Dutasteride        | -8.36                 | 3.65                  |
| 4                | ZINC000003993855        | Tadalafil          | -8.28                 | 3.42                  |
| 5                | ZINC000052955754        | Ergotamine         | -8.10                 | 3.72                  |
| <b>6</b>         | <b>ZINC000100378061</b> | <b>Naldemedine</b> | <b>-8.06</b>          | <b>2.98</b>           |
| 7                | ZINC000003920266        | Idarubicin         | -8.04                 | 3.25                  |
| 8                | ZINC000001530788        | Simeprevir         | -8.02                 | 3.68                  |
| 9                | ZINC000013831130        | Raltegravir        | -7.98                 | 3.35                  |
| 10               | ZINC000014210642        | Azilsartan         | -7.90                 | 3.27                  |
| 11               | ZINC000058581064        | Dolutegravir       | -7.88                 | 3.73                  |
| 12               | ZINC000003927822        | Lurasidone         | -7.80                 | 3.53                  |
| 13               | ZINC000004214700        | Paliperidone       | -7.78                 | 3.58                  |
| <b>14</b>        | <b>ZINC000222731806</b> | <b>Enasidenib</b>  | <b>-7.76</b>          | <b>2.89</b>           |
| 15               | ZINC000012503187        | Conivaptan         | -7.76                 | 3.33                  |
| 16               | ZINC000001530886        | Telmisartan        | -7.74                 | 3.35                  |
| 17               | ZINC000003938684        | Etoposide          | -7.72                 | 3.53                  |
| 18               | ZINC000029416466        | Saquinavir         | -7.70                 | 3.32                  |
| 19               | ZINC000072318121        | Abemaciclib        | -7.70                 | 3.65                  |
| 20               | ZINC000008101127        | Indocyanine        | -7.68                 | 3.52                  |
| 21               | ZINC000011617039        | Pazopanib          | -7.66                 | 3.58                  |
| 22               | ZINC000003938686        | Palbociclib        | -7.66                 | 3.61                  |
| 23               | ZINC000004099008        | Teniposide         | -7.66                 | 3.67                  |
| 24               | ZINC000035328014        | Ibrutinib          | -7.64                 | 3.45                  |
| 25               | ZINC000253632968        | Cromolyn           | -7.64                 | 3.68                  |
| 26               | ZINC000043100709        | Trematinib         | -7.60                 | 3.42                  |
| 27               | ZINC000003831151        | Montelukast        | -7.58                 | 3.41                  |
| 28               | ZINC000022448696        | Indinavir          | -7.54                 | 3.29                  |
| 29               | ZINC000040430143        | Olaparib           | -7.52                 | 3.86                  |

|           |                         |                  |              |             |
|-----------|-------------------------|------------------|--------------|-------------|
| 30        | ZINC000049036447        | Suvorexant       | -7.50        | 3.53        |
| <b>31</b> | <b>ZINC000003976838</b> | <b>Afatinib</b>  | <b>-7.44</b> | <b>3.04</b> |
| 32        | ZINC000003816514        | Rolapitant       | -7.44        | 3.40        |
| 33        | ZINC000013986658        | Idelalisib       | -7.42        | 3.26        |
| 34        | ZINC000013818943        | Regadenoson      | -7.38        | 3.20        |
| 35        | ZINC000100003902        | Maraviroc        | -7.38        | 3.59        |
| 36        | ZINC000019632618        | Imatinib         | -7.36        | 3.11        |
| 37        | ZINC000003827556        | Delafloxacin     | -7.34        | 3.14        |
| 38        | ZINC000003986735        | Dasatinib        | -7.32        | 3.46        |
| 39        | ZINC000027990463        | Lomitapide       | -7.32        | 3.79        |
| 40        | ZINC000003932831        | Candesartan      | -7.32        | 3.64        |
| 41        | ZINC000035902489        | Crizotinib       | -7.30        | 3.57        |
| 42        | ZINC000004175630        | Pimozide         | -7.30        | 3.73        |
| 43        | ZINC000019796168        | Sildenafil       | -7.28        | 3.55        |
| 44        | ZINC000043206370        | Niraparib        | -7.26        | 3.46        |
| <b>45</b> | <b>ZINC000003918453</b> | <b>Ertapenem</b> | <b>-7.24</b> | <b>2.95</b> |
| 46        | ZINC000003860453        | Fluorescein      | -7.22        | 3.56        |
| 47        | ZINC000001481815        | Deferasirox      | -7.22        | 3.59        |
| 48        | ZINC000018324776        | Vardenafil       | -7.20        | 3.62        |
| 49        | ZINC000060325170        | Cobimetinib      | -7.18        | 3.16        |
| 50        | ZINC000000537791        | Glimepiride      | -7.18        | 3.51        |
| 51        | ZINC000001489478        | Sitagliptin      | -7.18        | 3.60        |
| 52        | ZINC000003812865        | Olsalazine       | -7.18        | 3.67        |
| 53        | ZINC000011677837        | Apixaban         | -7.12        | 3.78        |
| 54        | ZINC000005844788        | Nebivolol        | -7.04        | 3.43        |
| 55        | ZINC000000897240        | Azelastine       | -7.04        | 3.45        |
| 56        | ZINC000100022637        | Tipranavir       | -6.92        | 3.37        |
| 57        | ZINC000001552174        | Cilostazol       | -6.86        | 3.45        |
| 58        | ZINC000030691797        | Perampanel       | -6.82        | 3.67        |
| 59        | ZINC000085537017        | Cangrelor        | -6.44        | 3.28        |
| <b>60</b> | <b>ZINC000003944422</b> | <b>Ritonavir</b> | <b>-6.70</b> | <b>3.52</b> |
| 61        | ZINC000001530948        | Thalidomide      | -6.26        | 3.83        |

---

**Non-FDA and investigational drugs**


---

|           |                         |                       |               |             |
|-----------|-------------------------|-----------------------|---------------|-------------|
| <b>62</b> | <b>ZINC000012358610</b> | <b>Phthalocyanine</b> | <b>-10.46</b> | <b>3.63</b> |
| <b>63</b> | <b>ZINC000003780340</b> | <b>Hypericin</b>      | <b>-9.12</b>  | <b>2.85</b> |

|           |                         |                    |              |             |
|-----------|-------------------------|--------------------|--------------|-------------|
| 64        | ZINC000003922429        | Adozelesin         | -8.84        | 3.84        |
| 65        | ZINC000003975327        | Telomestatin       | -8.80        | 3.34        |
| 66        | ZINC000043203371        | MK-3207            | -8.74        | 3.54        |
| 67        | ZINC000059749972        | Radotinib          | -8.68        | 3.43        |
| 68        | ZINC000003812168        | Ruboxistaurin      | -8.56        | 3.55        |
| 69        | ZINC000003950115        | TMC647055          | -8.50        | 3.77        |
| 70        | ZINC000095092808        | —                  | -8.48        | 3.86        |
| 71        | ZINC000049888572        | —                  | -8.42        | 3.55        |
| <b>72</b> | <b>ZINC000095539256</b> | <b>UK-432,097</b>  | <b>-8.34</b> | <b>3.18</b> |
| <b>73</b> | <b>ZINC000038576002</b> | <b>R-343</b>       | <b>-8.30</b> | <b>2.71</b> |
| 74        | ZINC000014880002        | Dihydroergotoxine  | -8.30        | 3.43        |
| 75        | ZINC000004215648        | Dihydroergocornine | -8.30        | 3.80        |
| 76        | ZINC000003817327        | Ly2090314          | -8.30        | 3.83        |
| 77        | ZINC000003781738        | Lestaurtinib       | -8.26        | 3.53        |
| 78        | ZINC000254071113        | Ciluprevir         | -8.26        | 3.64        |
| 79        | ZINC000063933734        | Rebastinib         | -8.24        | 3.36        |
| 80        | ZINC000059185874        | GDC-0834           | -8.24        | 3.58        |
| 81        | ZINC000043133316        | Tirilazad          | -8.24        | 3.87        |
| 82        | ZINC000098208742        | Entospletinib      | -8.20        | 3.57        |
| 83        | ZINC000018710085        | —                  | -8.20        | 3.97        |
| 84        | ZINC000003930598        | —                  | -8.18        | 3.71        |
| 85        | ZINC000004215770        | Elsamitrucin       | -8.12        | 3.31        |
| <b>86</b> | <b>ZINC000003780800</b> | <b>Amrubicin</b>   | <b>-8.10</b> | <b>2.96</b> |
| 87        | ZINC000001539348        | —                  | -8.10        | 3.39        |
| 88        | ZINC000003978083        | Tubocurarine       | -8.10        | 3.56        |
| 89        | ZINC000068250462        | Tucatinib          | -8.10        | 3.88        |
| 90        | ZINC000001494900        | Enzastaurin        | -8.08        | 3.48        |
| 91        | ZINC000003950115        | Lonafarnib         | -8.08        | 3.73        |
| 92        | ZINC000019899628        | Fenoverine         | -8.06        | 4.06        |
| 93        | ZINC000095535868        | Rwj-58259          | -8.04        | 3.55        |
| 94        | ZINC000001490807        | —                  | -8.04        | 3.60        |
| 95        | ZINC000006717782        | BMS-599626         | -8.04        | 3.66        |
| 96        | ZINC000100001820        | PF-00477736        | -8.02        | 3.49        |
| 97        | ZINC000028827350        | Telcagepant        | -8.20        | 3.58        |
| 98        | ZINC000003973984        | Sotrastaurin       | -8.02        | 3.68        |

|                                                           |                         |                                 |              |             |
|-----------------------------------------------------------|-------------------------|---------------------------------|--------------|-------------|
| 99                                                        | ZINC000021290045        | —                               | -8.00        | 3.32        |
| 100                                                       | ZINC000100029945        | Zosuquidar                      | -8.00        | 3.45        |
| 101                                                       | CID121304016            | Remdesivir                      | -6.44        | 2.84        |
| <b>Natural products from ZINC database and flavonoids</b> |                         |                                 |              |             |
| <b>102</b>                                                | <b>ZINC000150352420</b> | <b>Theacitrin A</b>             | <b>-9.82</b> | <b>3.31</b> |
| <b>103</b>                                                | <b>ZINC000004098612</b> | <b>Corilagin</b>                | <b>-9.58</b> | <b>3.22</b> |
| 104                                                       | ZINC000008214976        | Theasinensin B                  | -9.18        | 3.41        |
| 105                                                       | ZINC000169372863        | Theasinensin A                  | -9.16        | 3.42        |
| <b>106</b>                                                | <b>ZINC000003978446</b> | <b>Theaflavin</b>               | <b>-9.16</b> | <b>3.75</b> |
| 107                                                       | ZINC000004235306        | —                               | -9.18        | 3.52        |
| 108                                                       | ZINC000230071666        | Theacitrin C                    | -8.96        | 3.54        |
| <b>109</b>                                                | <b>ZINC000003984030</b> | <b>Amentoflavone</b>            | <b>-8.88</b> | <b>3.48</b> |
| 110                                                       | ZINC000169333962        | Theasinensin F                  | -8.78        | 3.43        |
| 111                                                       | ZINC000001531664        | Ginkgetin                       | -8.76        | 3.68        |
| 112                                                       | ZINC000044351169        | Proanthocyanidin A1             | -8.76        | 3.74        |
| 113                                                       | ZINC000003978800        | Rhoifolin                       | -8.70        | 3.56        |
| 114                                                       | ZINC000004098619        | Proanthocyanidin A2             | -8.68        | 3.69        |
| 115                                                       | ZINC000095619717        | Proanthocyanidin A5'            | -8.64        | 3.54        |
| 116                                                       | ZINC000003197535        | Isoginkgetin                    | -8.54        | 3.67        |
| <b>117</b>                                                | <b>ZINC000014887561</b> | <b>Zeylanone</b>                | <b>-8.44</b> | <b>3.56</b> |
| 118                                                       | CID10077799             | Isocorilagin                    | -8.28        | 3.81        |
| <b>119</b>                                                | <b>ZINC000003870412</b> | <b>Epigallocatechin gallate</b> | <b>-8.28</b> | <b>3.50</b> |
| 120                                                       | ZINC000006624329        | —                               | -8.28        | 3.77        |
| 121                                                       | ZINC000002148919        | —                               | -8.26        | 3.63        |
| 122                                                       | ZINC000002107922        | —                               | -8.24        | 3.82        |
| 123                                                       | ZINC000002161217        | —                               | -8.22        | 3.48        |
| 124                                                       | ZINC000008297065        | —                               | -8.20        | 3.67        |
| 125                                                       | ZINC000002125422        | —                               | -8.18        | 3.50        |
| 126                                                       | ZINC000008764269        | —                               | -8.16        | 3.50        |
| 127                                                       | ZINC000008789992        | —                               | -8.12        | 3.56        |
| 128                                                       | ZINC000012296408        | —                               | -8.10        | 3.59        |
| 129                                                       | ZINC000002147804        | —                               | -8.08        | 3.55        |
| 130                                                       | ZINC000012881832        | —                               | -8.06        | 3.46        |
| 131                                                       | ZINC000002158857        | —                               | -8.06        | 3.46        |
| 132                                                       | CID5321811              | Bavacoumestan A                 | -8.04        | 3.60        |

|                            |                         |                                   |              |             |
|----------------------------|-------------------------|-----------------------------------|--------------|-------------|
| <b>133</b>                 | <b>ZINC000100828606</b> | <b>Neodiosmin</b>                 | <b>-8.04</b> | <b>3.12</b> |
| 134                        | ZINC000011865175        | —                                 | -8.00        | 3.67        |
| 135                        | ZINC000002114470        | —                                 | -8.00        | 3.60        |
| <b>136</b>                 | <b>ZINC000100777667</b> | <b>Glabrolide</b>                 | <b>-7.89</b> | <b>3.94</b> |
| 137                        | CID12443227             | Epitaraxerol                      | -7.00        | 3.79        |
| 138                        | ZINC000004098322        | Homoeriodictyol                   | -6.64        | 3.42        |
| 139                        | ZINC000018847034        | Daidzein                          | -6.04        | 3.75        |
| <b>Steroids</b>            |                         |                                   |              |             |
| 140                        | CID27125                | Estetrol                          | -6.86        | 3.39        |
| <b>141</b>                 | <b>ZINC000004340309</b> | <b>Cortisol</b>                   | <b>-6.80</b> | <b>3.62</b> |
| <b>142</b>                 | <b>CID5757</b>          | <b>Estradiol</b>                  | <b>-6.74</b> | <b>3.41</b> |
| 143                        | CID5994                 | Progesterone                      | -6.70        | 3.93        |
| 144                        | ZINC000004428526        | Androstenedione                   | -6.66        | 3.65        |
| 145                        | CID91451                | 17- $\alpha$ -hydroxypregnanolone | -6.62        | 3.41        |
| 146                        | ZINC000003815419        | 2-Hydroxyestradiol                | -6.46        | 3.67        |
| 147                        | ZINC000003807917        | Dehydroepiandrosterone            | -6.40        | 3.81        |
| 148                        | ZINC000004081043        | Allopregnanolone                  | -6.34        | 3.88        |
| 149                        | <b>ZINC000118912393</b> | <b>Testosterone</b>               | <b>-6.32</b> | <b>3.90</b> |
| <b>Reference compounds</b> |                         |                                   |              |             |
| 150                        | ZINC000013985228        | Tideglusib                        | -6.64        | 3.71        |
| 151                        | PDB code 6LU7           | N3                                | -6.00        | 3.23        |
| 152                        | ZINC000001714738        | Cinanserin                        | -5.90        | 3.54        |
| 153                        | CID3194                 | Ebselen                           | -5.74        | 4.17        |
| 154                        | ZINC000001542916        | Carmofur                          | -5.60        | 3.64        |
| 155                        | ZINC000013209429        | PX-12                             | -3.84        | 3.97        |
| 156                        | ZINC000001529266        | Disulfiram                        | -3.80        | 3.45        |
| 157                        | ZINC000002015152        | Shikonin                          | -2.72        | 3.59        |
